# Supplementary material for: Quorum-sensing synthase mutations re-calibrate autoinducer concentrations in clinical isolates of Pseudomonas aeruginosa to enhance pathogenesis
Source: Springer Nature journal article supplement (doi:10.1038/s41467-023-43702-4), 2023-12-02
Supplement: MOESM1 [file 41467_2023_43702_MOESM1_ESM.pdf]

## Supplementary Information

Quorum-sensing synthase mutations re-calibrate autoinducer concentrations in clinical isolates of  
*Pseudomonas aeruginosa* to enhance pathogenesis

Kayla A. Simanek<sup>1</sup>, Megan L. Schumacher<sup>1</sup>, Caleb P. Mallery<sup>1</sup>, Stella Shen<sup>2</sup>, Lingyun Li<sup>3</sup>, and Jon E.  
Paczkowski<sup>1,2</sup>

<sup>1</sup>Department of Biomedical Sciences, University at Albany, School of Public Health, Albany, New York,  
12201, United States

<sup>2</sup>Division of Genetics, Wadsworth Center, New York State Department of Health, Albany, New York,  
12208, United States

<sup>3</sup>Division of Environmental Health Sciences, Wadsworth Center, New York State Department of  
Health, Albany, New York, 12208, United States

Corresponding author: Jon Paczkowski; e-mail address: [jon.paczkowski@health.ny.gov](mailto:jon.paczkowski@health.ny.gov)

## **Contents:**

- I.      Supplementary Figures**
- II.     Supplementary Tables**
- III.    Supplementary References**

## I. Supplementary Figures

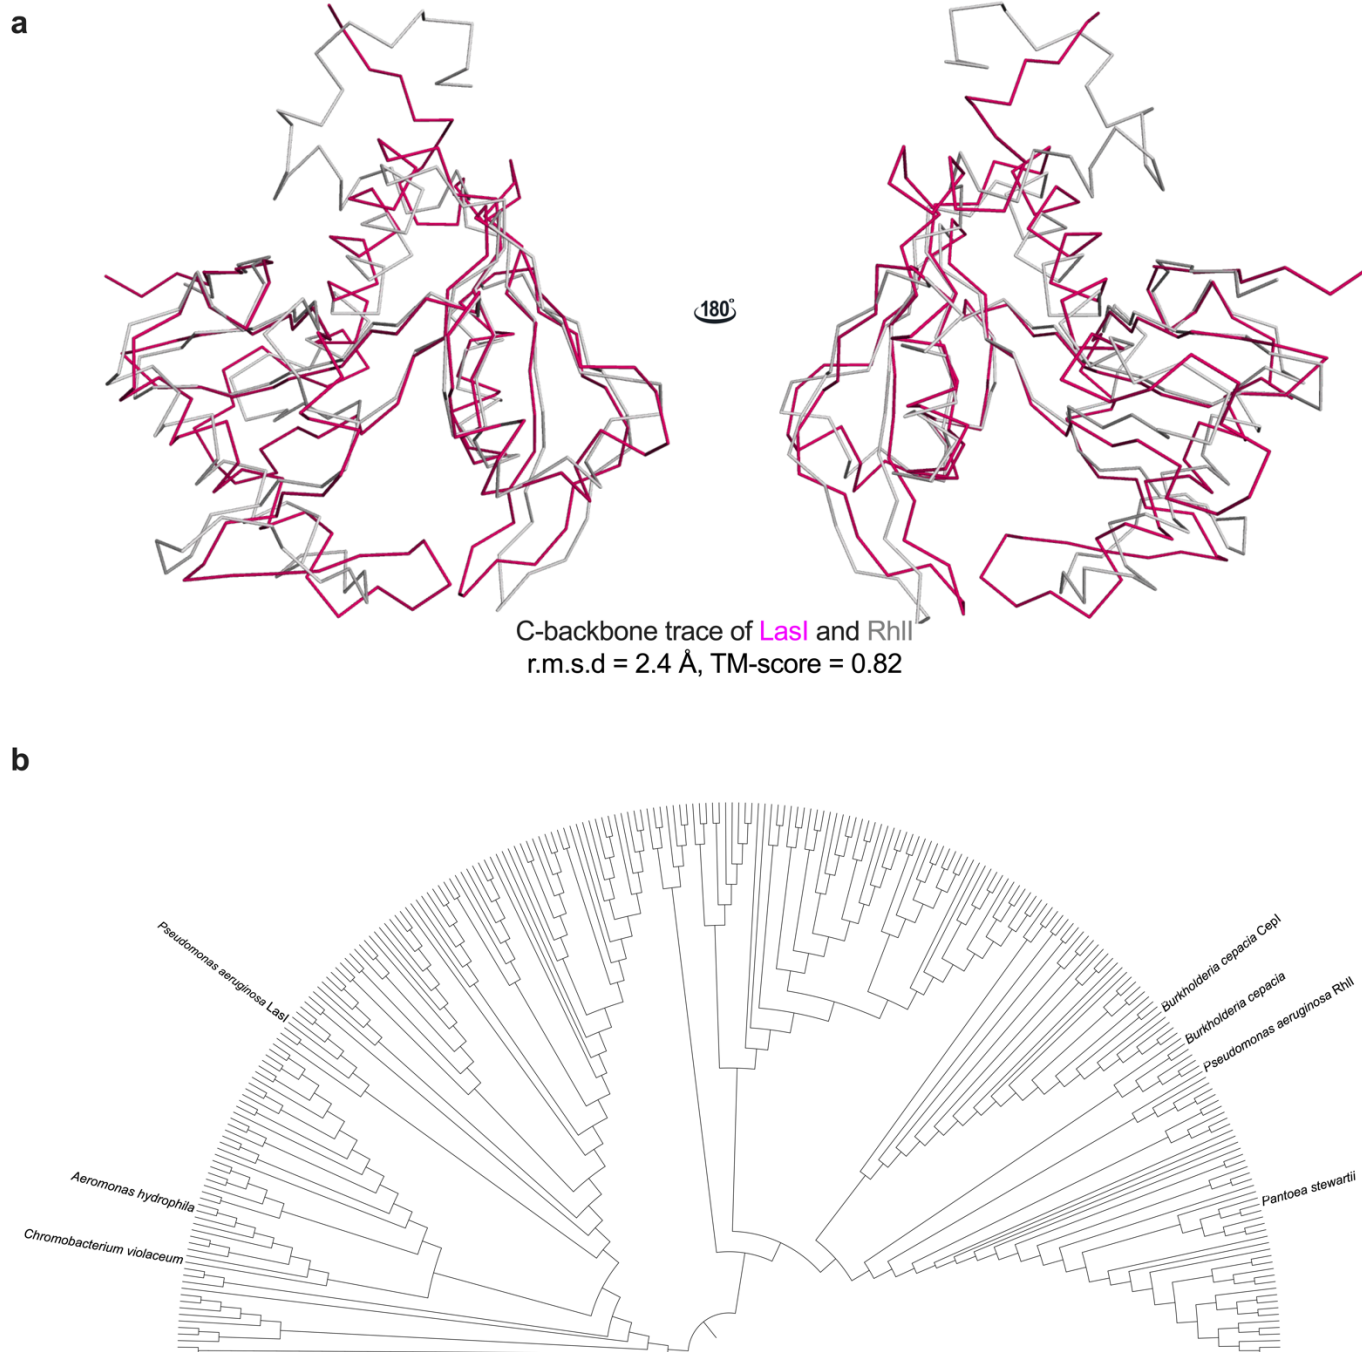

**Figure S1: Structural comparison of AHL-synthases.** (a) Structural overlay of the C-backbone of LasI (magenta) and RhlI (gray). The r.m.s.d. (root-mean-squared deviation) and TM-score were determined using the DockRMSD docking pose distance calculation<sup>1</sup>. Protein pairs with a TM-score >0.5 are considered to be nearly the same fold. (b) Phylogenetic tree of RhlI orthologous sequences, highlighting the species *Chromobacterium violaceum*, *Aeromonas hydrophila*, *P. aeruginosa*, *Burkholderia cepacia*, and *Pantoea stewartii*. The phylogenetic reconstruction was based on the alignment of 264 orthologous protein sequences obtained from OrthoDB v11<sup>2</sup>.



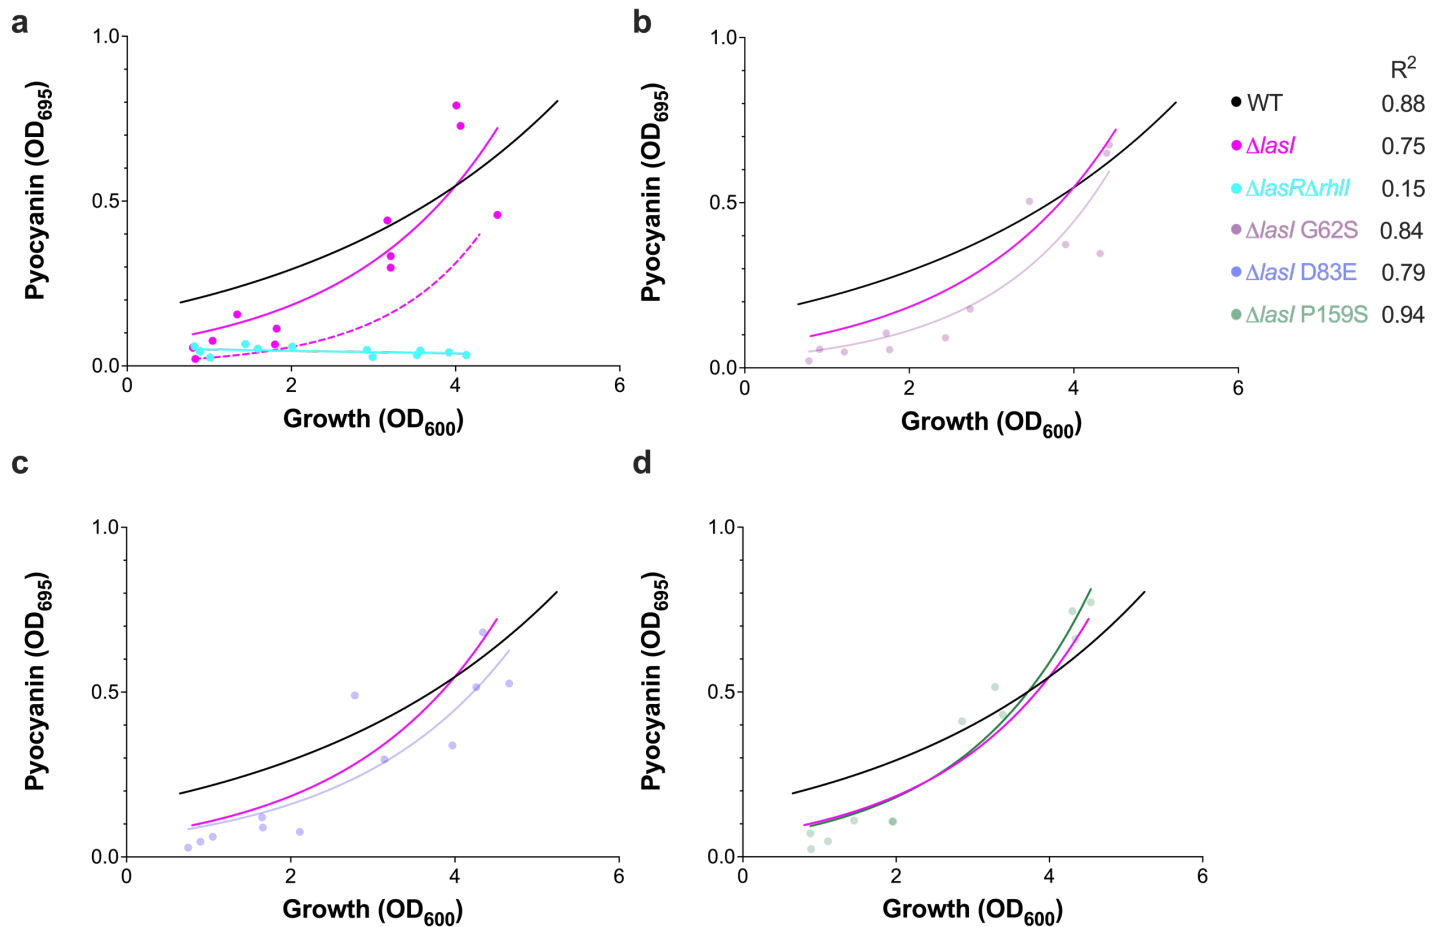

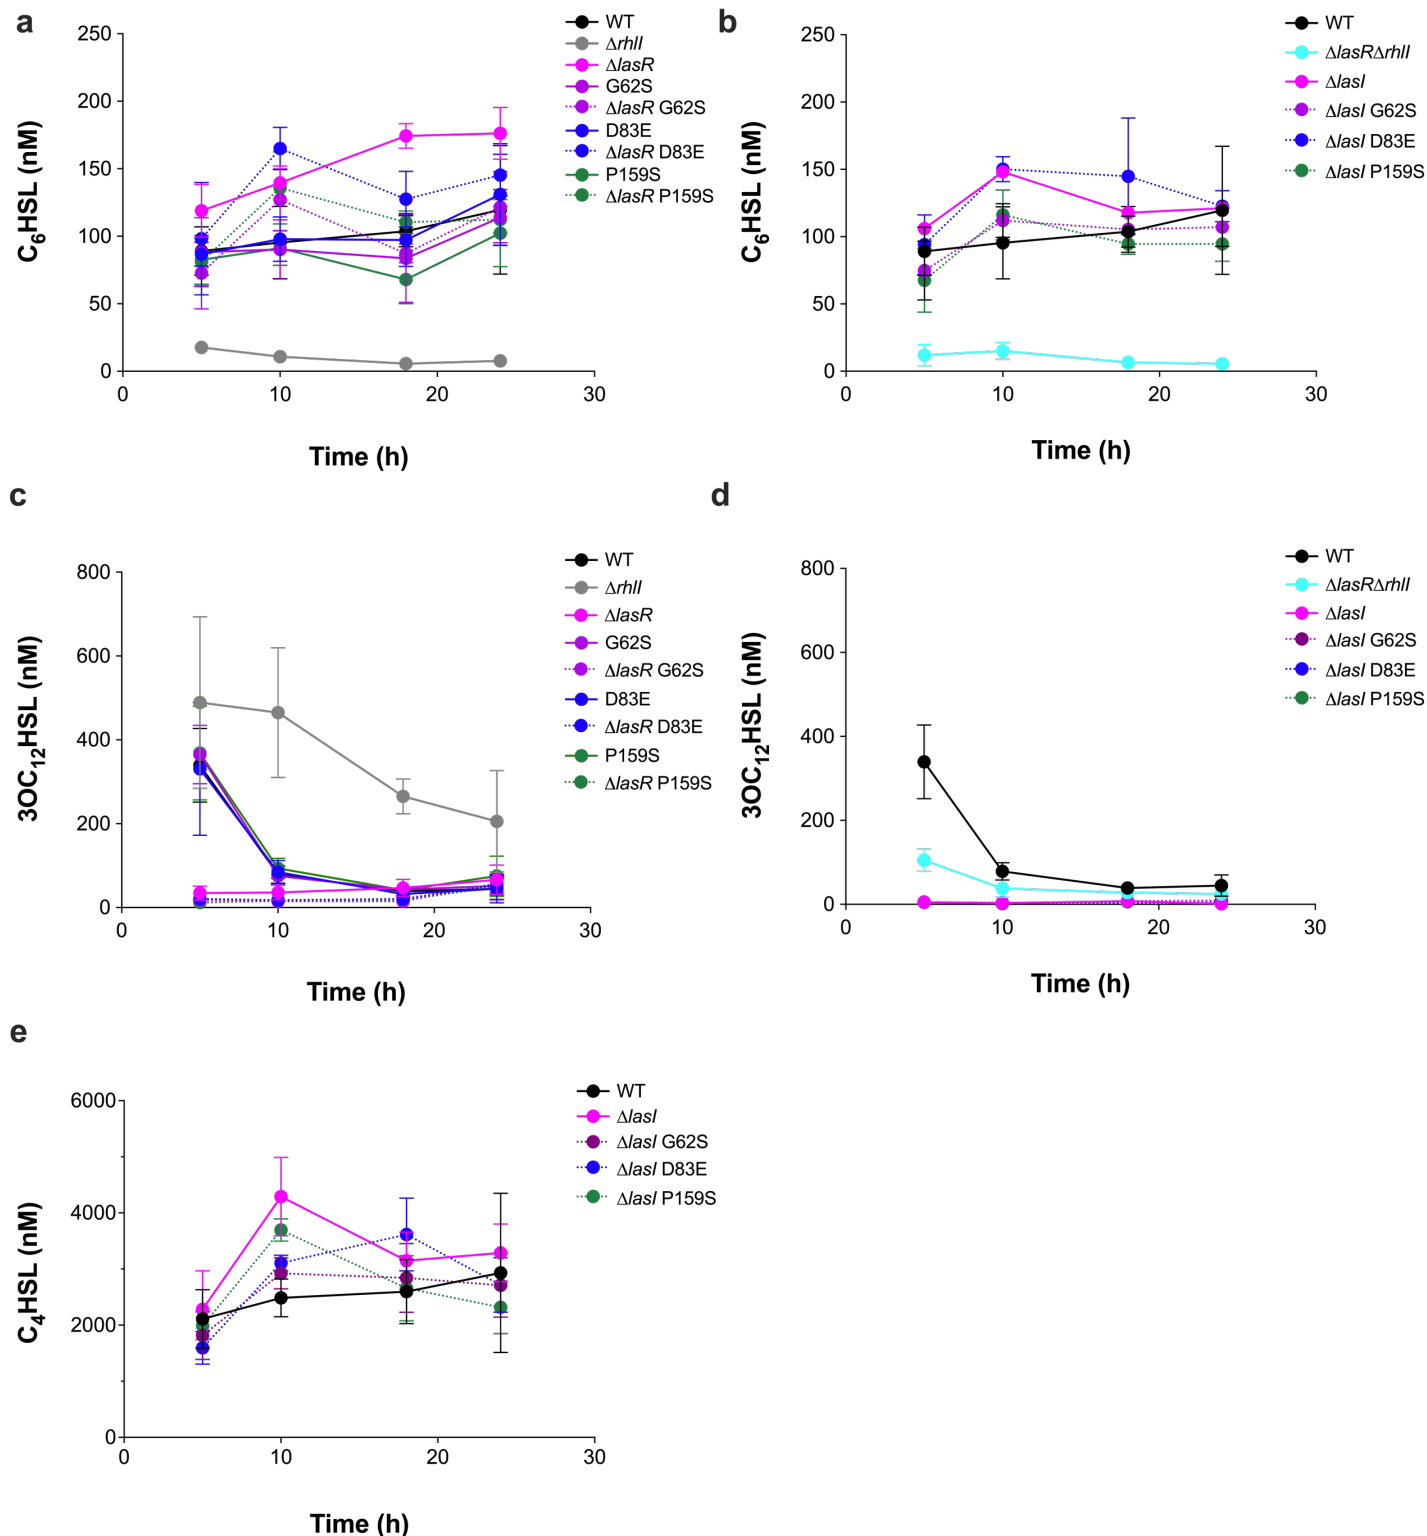

**Figure S4: AHL levels produced in *P. aeruginosa* mutant strains measured by HRMS over time.** Absolute concentrations of  $C_6\text{HSL}$  and  $3\text{OC}_{12}\text{HSL}$  synthesized by RhII variants in a  $\Delta\text{lasR}$  background (a,c) and a  $\Delta\text{lasI}$  background (b,d), respectively. (e)  $C_4\text{HSL}$  concentrations synthesized by RhII variants in a  $\Delta\text{lasI}$  background. Bars represent the mean of three biological replicates. Error bars represent standard deviations of the means of biological replicates.

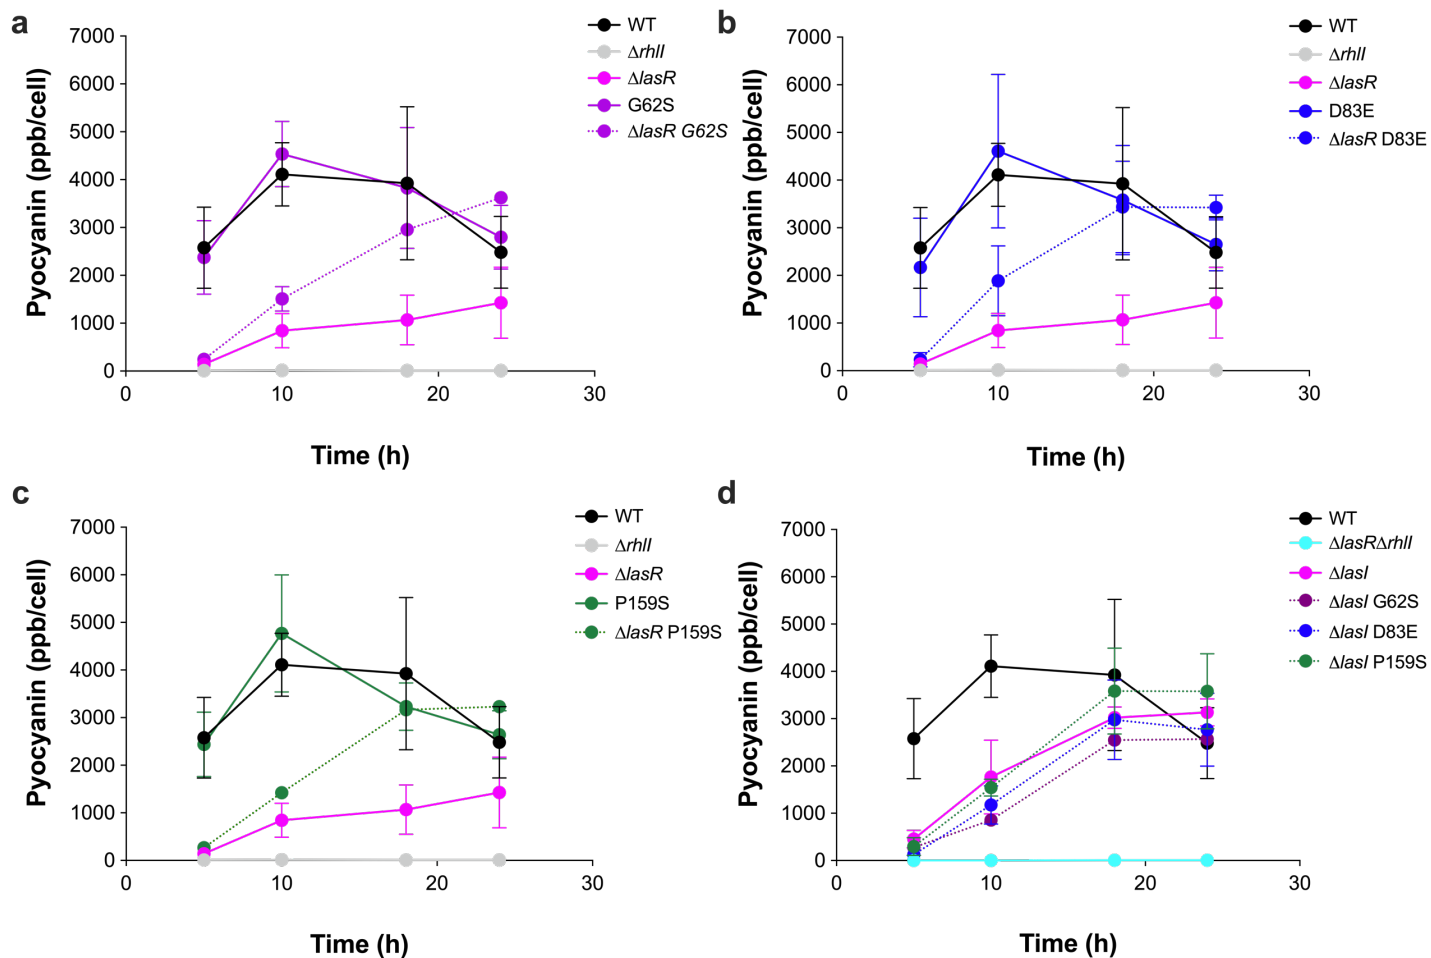

**Figure S5: Pyocyanin production in *P. aeruginosa* mutant strains measured by HRMS over time.** Absolute pyocyanin levels of PA14 control strains WT (black),  $\Delta rhII$  (gray) and  $\Delta lasR$  (magenta), as well as the (a) G62S variants, (b) D83E variants, (c) P159S variants in LasR+ (solid lines) and LasR- ( $\Delta lasR$ , dashed lines) backgrounds. (d) Pyocyanin synthesized by RhlI variants in a  $\Delta lasI$  background. All pyocyanin measurements are normalized to the OD<sub>600</sub> at each time point. Bars represent the mean of three biological replicates. Error bars represent standard deviations of the means of biological replicates.

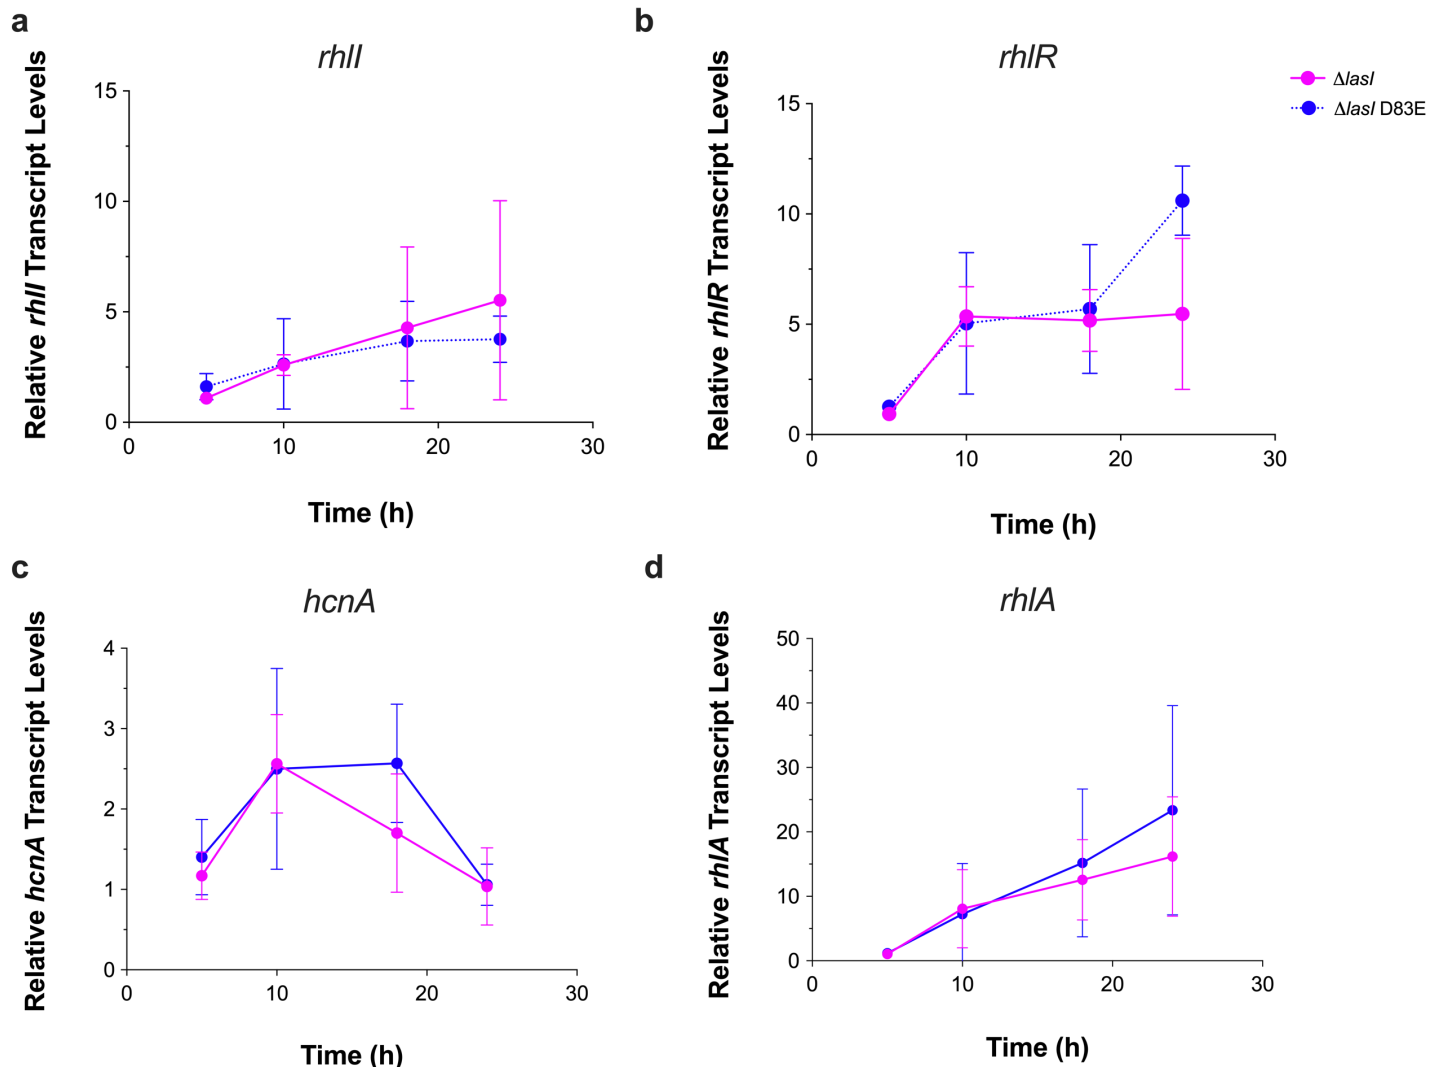

**Figure S6: RhII variants increase *rhIR* transcription in a  $\Delta lasI$  strain over time.** The relative transcript levels of (a) *rhII* (b) *rhIR* (c) *hcnA*, and (d) *rhIA* in  $\Delta lasI$  (magenta) and  $\Delta lasI$  RhII D83E (blue) strains. Gene expression was normalized to *gyrA* in the  $\Delta lasI$  strain at the 5-hour time point. Bars represent the mean of three biological replicates performed in technical duplicate. Error bars represent standard deviations of the means of biological replicates.



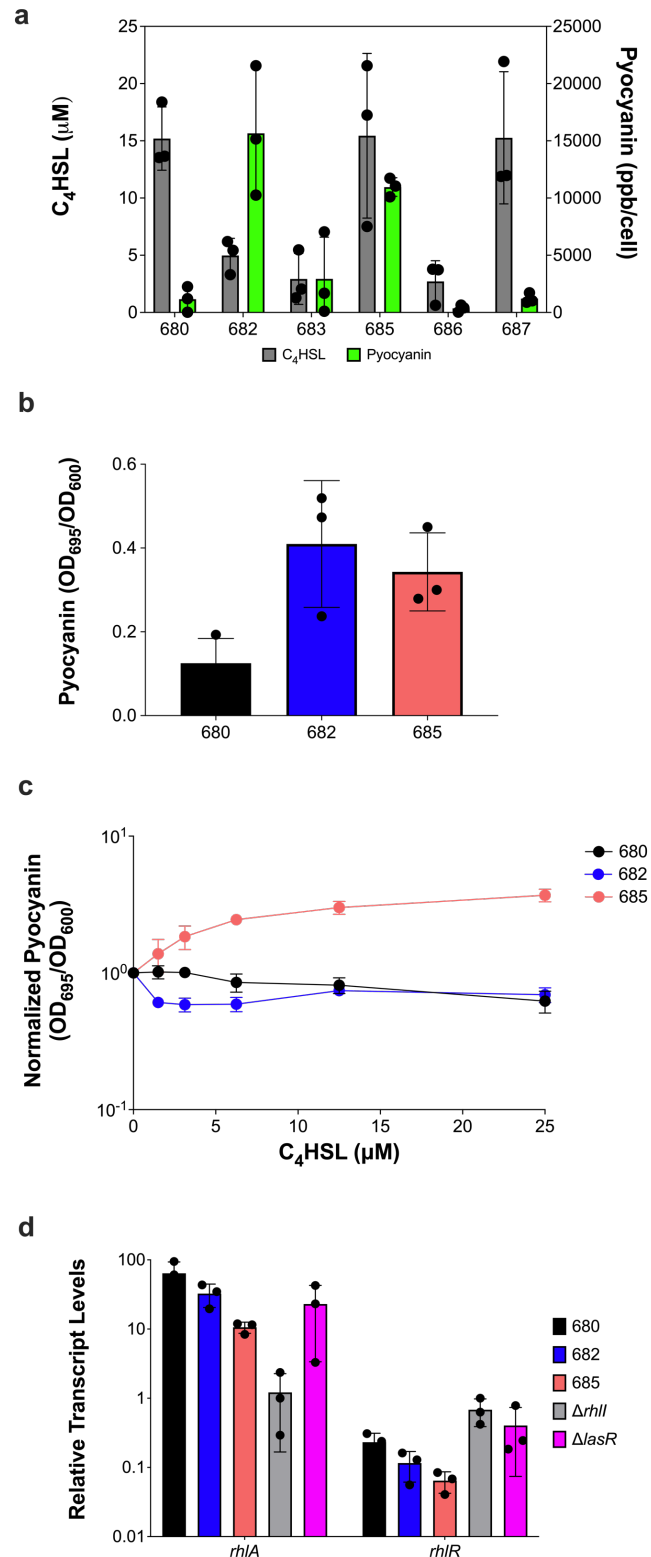

**Figure S7: Virulence phenotype expression in clinical isolates is dependent on C<sub>4</sub>HSL levels.** (a) Pyocyanin and C<sub>4</sub>HSL production of select clinical isolates with different *lasR* and *rhlI* mutations measured by HRMS using cell-free supernatant of high-density cultures grown in phosphate-limiting media. (b) Absolute pyocyanin levels using absorbance measurements. (c) C<sub>4</sub>HSL dose-response assay of clinical strains grown in phosphate-limiting media. (d) qRT-PCR of *rhlA* and *rhlR* in clinical strains and PA14 *ΔlasR* and *ΔrhlI*. Bars represent the mean of three biological replicates performed in technical duplicate. Error bars represent standard deviations of the means of biological replicates. Gene expression was normalized to *gyrA* for *ΔrhlI*. All experiments were performed in biological triplicate.

## II. Supplementary Tables

**Table S1.** *QS genotypes observed in the 56 clinical isolate cohort.*

| <b>SRR number</b> | <b>Source</b>                    | <b>LasR truncations and deletions</b> | <b>LasR substitutions</b> | <b>RhlI substitutions</b> | <b>Paczkowski lab strain ID</b> |
|-------------------|----------------------------------|---------------------------------------|---------------------------|---------------------------|---------------------------------|
| SRR13156973       | urine isolate                    | 1-239                                 |                           | D83E                      |                                 |
| SRR13156785       | wound isolate                    | 1-239                                 |                           | WT                        | 680                             |
| SRR13130527       | urine clean catch isolate        | 1-239                                 |                           | D83E                      |                                 |
| SRR13085620       | urine isolate                    | 1-239                                 | R61S                      | D83E                      |                                 |
| SRR13158623       | urine isolate                    | 1-239                                 |                           | D83E                      |                                 |
| SRR13158585       | knee isolate                     | 1-239                                 |                           | WT                        |                                 |
| SRR13156855       | urine isolate                    | 1-239                                 |                           | WT                        |                                 |
| SRR13130543       | tracheal aspirate isolate        | 1-239                                 |                           | WT                        |                                 |
| SRR13130413       | tracheal aspirate isolate        | 1-239                                 |                           | D83E                      |                                 |
| SRR13156781       | bronchoalveolar lavage isolate   | 1-172                                 | V171R                     | D83E                      |                                 |
| SRR13130516       | blood isolate                    | 1-239                                 |                           | D83E                      |                                 |
| SRR13119849       | urine isolate                    | 1-239                                 |                           | D83E                      |                                 |
| SRR13130514       | sputum isolate                   | 1-239                                 |                           | D83E                      |                                 |
| SRR13088655       | rectal swab                      | 1-151, 153-239                        |                           | D83E                      |                                 |
| SRR13156788       | ulcer isolate                    | 1-239                                 |                           | D83E                      |                                 |
| SRR13158616       | blood isolate                    | 1-239                                 |                           | D83E                      |                                 |
| SRR13158527       | blood isolate                    | 1-239                                 |                           | D83E, G62S                |                                 |
| SRR13158548       | sputum tracheal aspirate isolate | 1-87, 116-239                         |                           | D83E, G62S                |                                 |
| SRR13158481       | urine isolate                    | 1-239                                 | L236P                     | D83E, G62S                | 683                             |
| SRR13158660       | leg isolate                      | 1-144, 153-239                        |                           | D83E, G62S                |                                 |
| SRR13156975       | foot isolate                     | 1-148                                 |                           | D83E, G62S                |                                 |
| SRR13158514       | blood isolate                    | 116-239                               |                           | D83E, G62S                | 682                             |
| SRR13156968       | urine isolate                    | 1-239                                 |                           | D83E, G62S                |                                 |
| SRR13158501       | tracheal aspirate isolate        | 1-59, 116-239                         |                           | D83E                      |                                 |
| SRR13130517       | sputum isolate                   | 1-80, 116-239                         |                           | D83E                      | 685                             |
| SRR13158622       | sputum induced isolate           | 1-239                                 |                           | D83E                      | 686                             |
| SRR13156878       | sputum isolate                   | 1-239                                 |                           | D83E                      |                                 |

|             |                              |       |            |             |     |
|-------------|------------------------------|-------|------------|-------------|-----|
| SRR13158638 | rectal swab                  | 1-239 | G162D      | D83E        |     |
| SRR13158542 | rectal swab                  | 1-239 | G162D      | D83E        |     |
| SRR13158634 | tracheal<br>aspirate isolate | 1-239 | A231V      | D83E, P159S | 687 |
| SRR13158656 | urine isolate                | 1-239 | G191D      | D83E, P159S |     |
| SRR13158546 | rectal swab                  | 1-239 | G191D      | D83E        |     |
| SRR13158537 | abdomen<br>isolate           | 1-239 |            | D83E        |     |
| SRR13145343 | urine isolate                | 1-239 | 1-4, 9-239 | D83E        |     |
| SRR13156977 | urine isolate                | 1-172 |            | D83E        |     |
| SRR13156852 | urine isolate                | 1-172 |            | D83E        |     |
| SRR13158663 | urine isolate                | 1-172 |            | D83E        |     |
| SRR13156789 | urine isolate                | 1-172 |            | D83E        |     |
| SRR13158497 | urine isolate                | 1-172 |            | D83E        |     |
| SRR13156870 | urine isolate                | 1-172 |            | D83E        |     |
| SRR13156967 | urine isolate                | 1-172 |            | D83E        |     |
| SRR13145342 | urine isolate                | 1-173 | K173N      | D83E        |     |
| SRR13158480 | urine isolate                | 1-172 |            | D83E        |     |
| SRR13158505 | urine isolate                | 1-172 |            | D83E        |     |
| SRR13156880 | urine isolate                | 1-172 |            | D83E        |     |
| SRR13158479 | urine isolate                | 1-172 |            | D83E        |     |
| SRR13156871 | urine isolate                | 1-172 |            | D83E        |     |

**Table S2.** *Strains and plasmids used in this study.*

| Strain  | Genotype                        | Plasmid                    | Resistance | Source                                    |
|---------|---------------------------------|----------------------------|------------|-------------------------------------------|
| JPS0153 | PA14 $\Delta lasI$              |                            |            | Mukherjee <i>et al.</i> 2017 <sup>4</sup> |
| JPS0154 | PA14 $\Delta rhII$              |                            |            | Mukherjee <i>et al.</i> 2017 <sup>4</sup> |
| JPS0156 | PA14 $\Delta lasR$              |                            |            | Mukherjee <i>et al.</i> 2017 <sup>4</sup> |
| JPS0222 | WT PA14                         |                            |            | Gift from George O'Toole                  |
| JPS0841 | PA14 $\Delta lasR rhII$ (D83E)  |                            |            | this study                                |
| JPS0842 | PA14 $rhII$ (D83E)              |                            |            | this study                                |
| JPS0847 | PA14 $\Delta lasR rhII$ (G62S)  |                            |            | this study                                |
| JPS0900 | PA14 $\Delta lasR rhII$ (P159S) |                            |            | this study                                |
| JPS0901 | PA14 $rhII$ (G62S)              |                            |            | this study                                |
| JPS0958 | PA14 $rhII$ (P159S)             |                            |            | this study                                |
| JPS0976 | PA14 $\Delta lasI rhII$ (G62S)  |                            |            | this study                                |
| JPS1013 | PA14 $\Delta lasR \Delta rhII$  |                            |            | this study                                |
| JPS1014 | PA14 $\Delta lasI rhII$ (D83E)  |                            |            | this study                                |
| JPS1025 | PA14 $\Delta lasI rhII$ (P159S) |                            |            | this study                                |
| JPS0737 | <i>E. coli</i> DH5a             | pEXG2- <i>rhII</i>         | Gent       | this study                                |
| JPS0806 | <i>E. coli</i> DH5a             | pEXG2- <i>rhII</i> (G62S)  | Gent       | this study                                |
| JPS0828 | <i>E. coli</i> DH5a             | pEXG2- <i>rhII</i> (P159S) | Gent       | this study                                |
| JPS0830 | <i>E. coli</i> DH5a             | pEXG2- <i>rhII</i> (D83E)  | Gent       | this study                                |

**Table S3.** Primers used in this study.

| Name    | Sequence                                 | Purpose                         |
|---------|------------------------------------------|---------------------------------|
| oJP1320 | ttatt <u>aagctt</u> TTCGAGCGCGAGGAAATCCG | <i>rhII</i> for pEXG2 (HindIII) |
| oJP1321 | ttatt <u>ggatcc</u> AAATCGCGCATCAGGTTCGG | <i>rhII</i> for pEXG2 (BamHI)   |
| oJP1326 | CAACACGATATCCAGCCCCT                     | <i>hcnA</i> RT primer           |
| oJP1327 | CATTGAGCACGTTGAGCACG                     | <i>hcnA</i> RT primer           |
| oJP1328 | CCTGGCCGAACATTTCAACG                     | <i>rhIA</i> RT primer           |
| oJP1329 | TTTCCACCTCGTCGTCCTTG                     | <i>rhIA</i> RT primer           |
| oJP1330 | GAGGAACTGGAAGCGGTCAA                     | <i>gyrA</i> RT primer           |
| oJP1331 | CTTCCTCGGTGATCAGGTCG                     | <i>gyrA</i> RT primer           |
| oJP1414 | CATGGCACCTATCCCAAGGC                     | <i>rhIR</i> RT primer           |
| oJP1415 | GTCGCTCCAGACCACCATTT                     | <i>rhIR</i> RT primer           |
| oJP1416 | CCGAGCTGGGGATGAAGATA                     | <i>rhII</i> RT primer           |
| oJP1417 | CCGTTGCGAACGAAATAGCG                     | <i>rhII</i> RT primer           |
| oJP1426 | gccctggcggtcatggcgacga                   | <i>rhII</i> Gly62Ser g184a      |
| oJP1427 | tcgtcgccatgagccgccagggc                  | <i>rhII</i> Gly62Ser g184a      |
| oJP1428 | caggtaggcgaagacctccttgagcaggtag          | <i>rhII</i> Asp83Glu c249a      |
| oJP1429 | ctacctgctcaaggaggtcttcgcctacctg          | <i>rhII</i> Asp83Glu c249a      |
| oJP1502 | cttctgcggcgagccgaggcgct                  | <i>rhII</i> Pro159Ser c475t     |
| oJP1503 | agcgcctcggctcgccgcagaag                  | <i>rhII</i> Pro159Ser c475t     |

### III. Supplementary References

1. Bell, E. W. & Zhang, Y. DockRMSD: An open-source tool for atom mapping and RMSD calculation of symmetric molecules through graph isomorphism. *J Cheminform* **11**, 1–9 (2019).
2. Kuznetsov, D. *et al.* OrthoDB v11: annotation of orthologs in the widest sampling of organismal diversity. *Nucleic Acids Res* **51**, D445–D451 (2023).
3. Winsor, G. L. *et al.* Enhanced annotations and features for comparing thousands of *Pseudomonas* genomes in the *Pseudomonas* genome database. *Nucleic Acids Res* **44**, D646–D653 (2016).
4. Mukherjee, S., Moustafa, D., Smith, C. D., Goldberg, J. B. & Bassler, B. L. The RhIR quorum-sensing receptor controls *Pseudomonas aeruginosa* pathogenesis and biofilm development independently of its canonical homoserine lactone autoinducer. *PLoS Pathog* **13**, e1006504 (2017).
